# Supplementary material for: Digital logic circuits in yeast with CRISPR-dCas9 NOR gates
Source: PubMed Central journal article supplement (PMC5458518; doi:10.1038/ncomms15459), 2017-05-25
Supplement: ncomms15459-s4.pdf [file ncomms15459-s4.pdf]

**Editorial Note:** this manuscript has been previously reviewed at another journal that is not operating a transparent peer review scheme. This document only contains reviewer comments and rebuttal letters for versions considered at Nature Communications.
